# Supplementary material for: Phenotypic Characterization and Reproductive Performance of Blackhead Somali Sheep in Fafen Zone of Somali Regional State, Ethiopia
Source: Hindawi journal article supplement (doi:10.1155/2022/4865941), 2022-10-27
Supplement: f1 [file 4865941.f1.doc]

# **Annex-1:** Data Collection Format of Performance on Black Head Somali Sheep Breed in Somali Regional State, Ethiopia

**Qualitative physical characteristics Table format**

| **Character** | **Attribute** | **Male** | **Female** |
| --- | --- | --- | --- |
| Coat colour pattern | Plain |  |  |
| Patchy |  |  |
| Spotted |  |  |
| Coat colour type | White body with black head |  |  |
| White body |  |  |
| Black body |  |  |
| White body and black head with black dominant |  |  |
| Other (specify) |  |  |
| Dewlap | Present |  |  |
| Absent |  |  |
| Ear orientation | Erect |  |  |
| Semi-pendulous |  |  |
| Pendulous |  |  |
| Horizontal |  |  |
| Presence of horn | Present |  |  |
| Absent |  |  |
| Facial (head) profile | Straight |  |  |
| Concave |  |  |
| Convex |  |  |
| Back profile | Straight |  |  |
| Slopes up towards the rump |  |  |
| Slopes down from withers |  |  |
| Dipped (curved) |  |  |
| Rump profile | Flat |  |  |
| Sloping |  |  |
| Roofy |  |  |

# **Annex-2 Morphometric characteristics recording format**

**Recording for lamb at birth--------MALE (0, 1,3,6,9, 12 and 24 months)**

| **Parameter** | **Sex-** | **Sex-** | **Sex-** | **Sex-** | **Sex-** | **Sex-** | **Sex-** | **Sex-** | **Sex-** | **Sex-** | **Sex-** |
| --- | --- | --- | --- | --- | --- | --- | --- | --- | --- | --- | --- |
| Body weight (kg) |  |  |  |  |  |  |  |  |  |  |  |
| Heart girth (cm) |  |  |  |  |  |  |  |  |  |  |  |
| Body length (cm) |  |  |  |  |  |  |  |  |  |  |  |
| Height at Rump (cm) |  |  |  |  |  |  |  |  |  |  |  |
| Height at wither (cm) |  |  |  |  |  |  |  |  |  |  |  |
| Pelvic width (cm) |  |  |  |  |  |  |  |  |  |  |  |
| Chest depth(cm) |  |  |  |  |  |  |  |  |  |  |  |
| Tail circumference (cm) |  |  |  |  |  |  |  |  |  |  |  |
| Tail length (cm) |  |  |  |  |  |  |  |  |  |  |  |
| Ear length (cm) |  |  |  |  |  |  |  |  |  |  |  |
| Scrotal circumference |  |  |  |  |  |  |  |  |  |  |  |

# **Annex-3 Morphometric characteristics recording format**

**Recording for lamb at birth-FEMALE (0, 1,3,6,9, 12 and 24months)**

| Parameter | Sex- | Sex- | Sex- | Sex- | Sex- | Sex- | Sex- | Sex- | Sex- | Sex- | Sex- |
| --- | --- | --- | --- | --- | --- | --- | --- | --- | --- | --- | --- |
| Body weight (kg) |  |  |  |  |  |  |  |  |  |  |  |
| Heart girth (cm) |  |  |  |  |  |  |  |  |  |  |  |
| Body length (cm) |  |  |  |  |  |  |  |  |  |  |  |
| Height at Rump (cm) |  |  |  |  |  |  |  |  |  |  |  |
| Height at withers (cm) |  |  |  |  |  |  |  |  |  |  |  |
| Pelvic width (cm) |  |  |  |  |  |  |  |  |  |  |  |
| Chest depth(cm) |  |  |  |  |  |  |  |  |  |  |  |
| Tail circumference (cm) |  |  |  |  |  |  |  |  |  |  |  |
| Tail length (cm) |  |  |  |  |  |  |  |  |  |  |  |
| Ear length (cm) |  |  |  |  |  |  |  |  |  |  |  |

# **Annex-4: Reproductive Performance recording format**

| **Characters** | Sex- | Sex- | Sex- | Sex- | Sex- | Sex- | Sex- | Sex- | Sex- | Sex- |
| --- | --- | --- | --- | --- | --- | --- | --- | --- | --- | --- |
| Age at first service of male (month) |  |  |  |  |  |  |  |  |  |  |
| Age at service of female (month) |  |  |  |  |  |  |  |  |  |  |
| Age at first lambing (month) |  |  |  |  |  |  |  |  |  |  |
| Lambing interval |  |  |  |  |  |  |  |  |  |  |
| Reproductive life span of female (years) |  |  |  |  |  |  |  |  |  |  |
| Reproductive life span of male (years) |  |  |  |  |  |  |  |  |  |  |
| Lifespan lamb crop (number) |  |  |  |  |  |  |  |  |  |  |
| Twining rate (percent) |  |  |  |  |  |  |  |  |  |  |
| Triplet’s rate (percent) |  |  |  |  |  |  |  |  |  |  |
| Mortality rate in lambs (up to 3 months) |  |  |  |  |  |  |  |  |  |  |
